# Supplementary material
Source: publisher figshare collection journal article supplement (https://sage.figshare.com/ndownloader/files/16460936)
Supplement: Supplementary file 1 [file 16460936]

## Text 1 Supplement. Constitutional Convention Issue Attitude Survey Items

There are many issues regarding New York State and its government that could be discussed at a Constitutional Convention. I'm going to ask you about several specific proposals and for each I want you to tell me whether you strongly support it, somewhat support it, somewhat oppose it, or strongly oppose it. [Items Rotated]

- Current state policies that limit development in the Adirondacks for conservation purposes should be revised to allow for increased economic development.
- Members of the New York State Legislature should be subject to term limits, only allowing them to serve a limited number of terms in the Assembly and Senate.
- Statewide officials - Governor, Comptroller, Attorney General - should be subject to term limits, only allowing someone to serve two terms in that office.
- Similar to some other states, New York should allow citizens to vote directly on proposed laws through a ballot initiative process.
- The so-called LLC loophole that allows corporations or individuals to donate almost unlimited amounts of money to candidates in New York should be eliminated.
- The job of state legislator should be changed from a part-time position that allows for outside employment to a full-time position that does not permit outside employment.
- The collective bargaining rights of public employees should be limited.
- Prohibit any law that unreasonably restricts the rights of a woman to full and free control over reproductive decisions.\*
- Similar to existing constitutional protections based on race, color, creed, or religion, add protection from discrimination based on gender identity, ethnicity and sex.\*
- The recreational use of marijuana should be legalized.\*\*

\*Items only included in the September survey.

\*\*Item only included in the October survey
